# Supplementary material for: Identification and phylogenetic analyses of VASt, an uncharacterized protein domain associated with lipid-binding domains in Eukaryotes
Source: PubMed Central journal article supplement (PMC4082322; doi:10.1186/1471-2105-15-222), 2014-06-26
Supplement: 1471-2105-15-222-S1.pdf [file 1471-2105-15-222-S1.pdf]

*Arabidopsis thaliana\_F4HVV5* 257 FNWKPEDTDAPKLS SDF TKVAEAKFSIPVEEF FRLFFSDGAVS FVESFHKNCGDKEFRCTSWQPHEKLGHTRNVSFQHP I KIYFGAKFGG CQESQKFRMYRNSHLVIETSQEISDVPYADYFTVEGVWDLKRDC 390  
*Arabidopsis lyrata\_D7KP35* 257 FNWKPEDIDAPKLS SDF TKVAEAKFSIPVEEF FRLFFSDGAVNFVESFHKNCGDKEFRCTSWQPHEKLGHTRNVSFQHP I KIYFGAKFGG CQESQKFRMYRDSHLVIETSQEISDVPYADYFTVEGVWDLKRDC 390  
*Vitis vinifera\_D7SLY9* 265 LTWKQENSVA PKVPEYYSNVAEAKFP I KVEEFTFFFSDDAVDF IESFHKRCGDKEFRCTSWSPHDKFGHARDKSFQHP I KLYFGAKFGG SCREAQKFRVYKNSHL I IETSQEVNDVPYGDYFTVEGLWNVESDG 398  
*Ricinus communis\_B9RCZ4* 273 - -WNEEDAEPPEIRKSYTRVGETKFP I KVEEFTFFFSDDASNFI ESFHQR CGDKEFRCSLWQPQEKLGHTRNVSFQHP I KIYFGAKFGG SCQEKQKQVYRNSHLVIETSQEINDVPYGDYFRVEGLWDVVKDA 404  
*Glycine max\_K7N211* 256 WKWNEEDIDAPSILEAYTCVADSVFP I KVEDDFRYLFSDDALNFLESFRQKCGDKDFRCS SWHPQEKFGYARELSFQHP I KIYLGAKFGG CHEVQKFRVYRNSHLVIETSQEVSDVPYADYFRVEGLWSVERDK 389  
*Glycine max\_D3G9M3* 256 WKWNEEDIDAPSILEAYTCVADSVFP I KVEDDFRYLFSDDALNFLESFRQKCGDKDFRCS SWHPQEKFGYARELSFQHP I KIYLGAKFGG CHEVQKFRVYRNSHLVIETSQEVSDVPYADYFRVEGLWSVERDK 389  
*Glycine max\_I1LAF8* 259 WKWNEEDIDAPSILEAYTCVADSVFPMKVEDDFRYLFSDDALNFLESFRQKCGDKDFRCS PWHPQEKFGYARELSFQHP I KIYLGAKFGG CHEVQKFRVYRNSHLVIETSQEVSDVPYADYFRVEGLWSVERDK 392  
*Musa acuminata\_MORUN1* 248 FSWTIEDIDAPKVPEHFAIVAESKFP LLVEDDFSLFVSDRAADFLKDFHTRCGDKDFQCTSWHRHEQFGYTRNV SFLHPVKVYLGAKFGNCQEVQKFHVFRNSHLVIETSQEQIDNVPYGDYFQVEGIWDVEQAS 381  
*Solanum lycopersicum\_K4AYW4* 271 YGLKQEDSDAPRVPEGFTLVAEAKFPVTVEKFFELFISDAGVAFQESFRRNCGDKDFKCTQWRPHEEFGHTRNLSFQHP I KIYLGPKFGG CHEFQKCRRYRNSHLVIESSQEISGVPFADYFRVEAFWDVERDG 404  
*Sorghum bicolor\_C5X970* 264 FNLEPLDD - APSVPE SYTMITESK FQVPVEVLFNMLLSDGAFGFVDDFHKKCGDKEFSCSKWRIDEQGGLVRDVSFLHP I KIYLGAKFGT CQEVQKLRLYKNRRLMIQTSQSIGDAPYGDHFTVEGIWDVEQDS 396  
*Oryza sativa\_B8B683* 257 F I LGPFDDEAPNVPEPFALITESK FQVPVEVLFNMLLSDSSFGFLDDFHKKCGDKEFRCS PWRLDEQGGLIRDVSFLHP I KIYLGAKFGG SCQEVQKLRVYKNRHLMIQTSQIQDAPYGDHFTVEGIWDVEQDS 390  
*Oryza brachyantha\_J3ML03* 217 F I LGPCDDAPNVPEPFTLITESK FQAPVEVMFNMLLSDS AFGFVDDLHKKCGDKEFRCS PWHLDEQGGLVRDVSFLHP I KIYLGAKFGT CQEVQKLRVYKNRHLMMQTSQIQDAPYGDHFTVEGIWDVEQDS 350  
*Setaria italica\_K3ZRJ5* 263 FNFEPVDEAAPSVPESYTLITESK FQVPVEVLFNMLLSDGSFDLDDFHKKCGDKDFSCSKWRSD EQGGLVRDVSFLHP I KIYLGAKFGT CQEVQKLRVYKNRHLV I QTSQSIGDAPYGDHFTVEGIWDIEQDS 396  
*Brachypodium distachyon\_I1GUB6* 261 FSSEPFDDAPNVPE SYTLITESK FQVPVEVLF DVLFS DGAFGFLDDLHKKCGDKEFRCSKWRLDEQ - GLARDVSFLHP I KIYLGAKFGT CQEVQKLRLYKNRH I V IRTSQEIGDAPYGDHFI VEG I WDVEQDS 393

*Arabidopsis thaliana\_F4HVV5* 391 RDSVEGC I LDVYVNVAFSKRTVWKGK I VQSTLEECREAYAHWIRMAHEL LKQKK - - - - - LENQE 449  
*Arabidopsis lyrata\_D7KP35* 391 RDSIEGC I LDVYVNVAFAKRTVWKGK I VQSTLEECREAYAHWIRMAHEL LKQKK - - - - - LENQE 449  
*Vitis vinifera\_D7SLY9* 399 DESNGGC I LRVYVNVAFSKKTMWKGK I VQSTVEECREAYA I WISLAHEL LKQKN - - - - - LEKQE 457  
*Ricinus communis\_B9RCZ4* 405 DESNEGCLLQIYVDVAFSKKT VFKGK I VQSTLEECREAYATWINMAHEL LKQKN - - - - - LESRE 463  
*Glycine max\_K7N211* 390 DESKECCFLRVYVNVAFSKKT IWKGK I I QSTIEECRDAYATWINMAHEMLKQKN - - - - - LEKQ - 447  
*Glycine max\_D3G9M3* 390 DESKECCFLRVYVNVAFSKKT IWKGK I I QSTIEECRDAYATWINMAHEMLKQKN - - - - - LEKQ - 447  
*Glycine max\_I1LAF8* 393 DESKECCFLRVYVNVAFSKKT IWKGK I I QSTIEECRDAYATWINMAHEMLKQKN - - - - - LEKQ - 450  
*Musa acuminata\_MORUN1* 382 KGE - NSCTVKVYSNVAFSKKT MFKGK I EQSTREESKEVYATWISIAHETLKEKNIGQSKAGLAEQD 446  
*Solanum lycopersicum\_K4AYW4* 405 DGPEGGC IMKVYLNLFVTKKTI FRGK I VQSTIDECRALYVKWIALARELLKQKK - - - - - LEKEK 463  
*Sorghum bicolor\_C5X970* 397 LDE - NCCDLRIYINVAFSKKT I FRGK I EQSTKDECREVFSLWIKLGHDL LKQ EY - - - - D - - - RPKG 454  
*Oryza sativa\_B8B683* 391 LDE - SSCYL RVYINVAFSKKT I FRGK I DQSTKDECRDVFGLWVWKLGHDL LKQDS - - - - SC - - HSRG 449  
*Oryza brachyantha\_J3ML03* 351 LDE - NSCYL RVYINVAFSKKT I FRGK I DQSTKDECRDVFELWIKLGHDL LKQDT - - - - SC - - HSRG 409  
*Setaria italica\_K3ZRJ5* 397 LDG - NCCFLRIYLNVAFSKKT I FRGK I EQSTKDECREVFSLWIKLGHDL LKQEN - - - - N - - - RPKD 454  
*Brachypodium distachyon\_I1GUB6* 394 LDG - NSCYL RVYINVAFSKKT I FRGK I EQSTKDECREVFSLWIKLGH DYLKQDN - - - - SSR LKDAE 454
